42. Kuhlmann L, Foster BL, Liley DT: Modulation of functional EEG networks by the NMDA antagonist nitrous oxide. *PLoS One* 2013; 8:e56434
43. Kayser J, Tenke CE: In search of the Rosetta Stone for scalp EEG: Converging on reference-free techniques. *Clin Neurophysiol* 2010; 121:1973–5
44. Moran RJ, Jones MW, Blockeel AJ, Adams RA, Stephan KE, Friston KJ: Losing control under ketamine: Suppressed cortico-hippocampal drive following acute ketamine in rats. *Neuropsychopharmacology* 2015; 40:268–77
45. Muthukumaraswamy SD: High-frequency brain activity and muscle artifacts in MEG/EEG: A review and recommendations. *Front Hum Neurosci* 2013; 7:138
46. Barkley GL BC: MEG and EEG in epilepsy. *J Clin Neurophysiol* 2003;163–78
47. Hämäläinen MS, Hari R, Ilmoniemi RJ, Knuutila J, Lounasmaa OV: Magnetoencephalography – theory, instrumentation, and applications to noninvasive studies of the working human brain 1993; 65:pp 413–505
48. Grech R, Cassar T, Muscat J, Camilleri KP, Fabri SG, Zervakis M, Xanthopoulos P, Sakkalis V, Vanrumste B: Review on solving the inverse problem in EEG source analysis. *J Neuroeng Rehabil* 2008; 5:25
49. Brookes MJ, Zumer JM, Stevenson CM, Hale JR, Barnes GR, Vrba J, Morris PG: Investigating spatial specificity and data averaging in MEG. *Neuroimage* 2010; 49:525–38

## ANESTHESIOLOGY REFLECTIONS FROM THE WOOD LIBRARY-MUSEUM

# No Monkeying Around: An Anesthesiologist at the Heart of NASA and Project Mercury

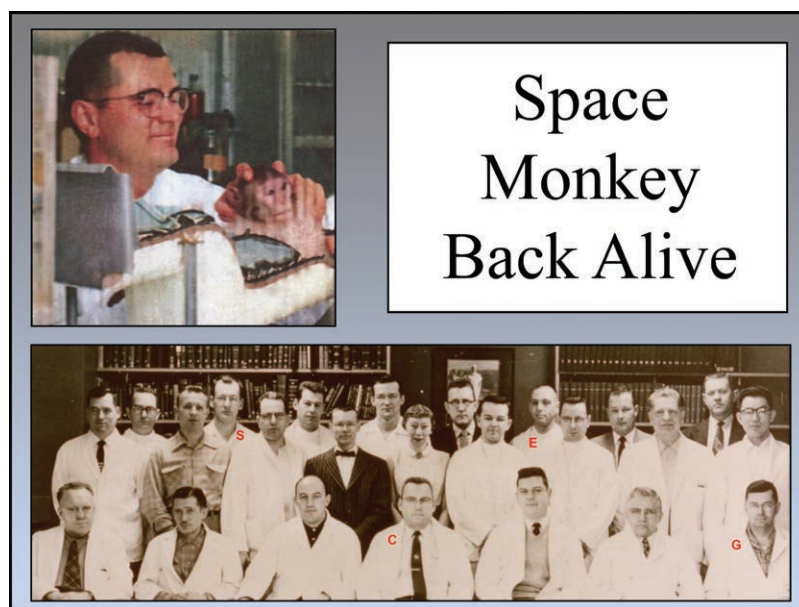

In October of 1957, cold war tensions rose between the United States and the Soviet Union after the latter launched the first artificial satellite, Sputnik. A year later, newly formed NASA was recruiting a young anesthesiologist to design a new instrument for Project Mercury and the first manned space flight. Clويد D. Green, M.D. (1921 to 2001, *upper left*) was tasked with building a biopack, or life support system, for primates in the test space missions that ultimately informed the equipment for the Apollo mission. Dr. Green was well positioned to create this new instrument based on his strong research background at the University of Iowa and his recent study of pilots flying at high altitude. While at the University of Iowa, Green (G) had been part of an all-star group (*bottom*) of anesthesiologists, which had included Drs. Stuart Cullen (C) and rising stars, such as Drs. John Severinghaus (S) and Edmond “Ted” Eger (E). By 1959, Dr. Green and NASA were celebrating the successful launch and retrieval of the Little Joe Capsule and the survival (headlined, *upper right*) of a rhesus monkey named Sam. (Copyright © the American Society of Anesthesiologists’ Wood Library-Museum of Anesthesiology.)

Melissa L. Coleman, M.D., Penn State College of Medicine, Hershey, Pennsylvania, and George S. Bause, M.D., M.P.H., Case Western Reserve University, Cleveland, Ohio.
